# Supplementary material for: Contrasting suitability and ambition in regional carbon mitigation
Source: Nat Commun. 2022 Jul 14;13:4077. doi: 10.1038/s41467-022-31729-y (PMC9283498; doi:10.1038/s41467-022-31729-y)
Supplement: Supplementary file 4 — Supplementary Data 1 [file 41467_2022_31729_MOESM4_ESM.xlsx]

## Sheet: Regions_Mapping
GTAP_Region_Name(141)	GTAP_Region_Code(141)	This study_Region_Name(27)	This study_Region_Short Name(27)	NDC scores (from Robiou du Pont and Meinshausen (2018))
Australia	aus	Australia	AU	4.4
Brazil	bra	Brazil	BR	3.7
Canada	can	Canada	CA	5.1
Kazakhstan	kaz	Central Asia	CE	5.1
Kyrgyzstan	kgz	Central Asia	CE	1.2
Rest of Former Soviet Union	xsu	Central Asia	CE	5.1
Tajikistan	tjk	Central Asia	CE	1.6
China	chn	China	CH	5.1
Hong Kong, China	hkg	China	CH
Taiwan	twn	China	CH
Austria	aut	European Union	EU	3.2
Belgium	bel	European Union	EU	3.2
Bulgaria	bgr	European Union	EU	3.6
Croatia	hrv	European Union	EU	4
Cyprus	cyp	European Union	EU	2.5
CzechRepublic	cze	European Union	EU	3.8
Denmark	dnk	European Union	EU	3
Estonia	est	European Union	EU	3.1
Finland	fin	European Union	EU	3.5
France	fra	European Union	EU	2.6
Germany	deu	European Union	EU	3
Greece	grc	European Union	EU	3.8
Hungary	hun	European Union	EU	4.6
Ireland	irl	European Union	EU	3.9
Italy	ita	European Union	EU	3.2
Latvia	lva	European Union	EU	4.9
Lithuania	ltu	European Union	EU	5.1
Luxembourg	lux	European Union	EU	3.8
Malta	mlt	European Union	EU	2.3
Netherlands	nld	European Union	EU	2.9
Poland	pol	European Union	EU	3.7
Portugal	prt	European Union	EU	4.1
Romania	rou	European Union	EU	4.2
Slovakia	svk	European Union	EU	3.5
Slovenia	svn	European Union	EU	3.9
Spain	esp	European Union	EU	3.4
Sweden	swe	European Union	EU	2.7
United Kingdom	gbr	European Union	EU	2.9
India	ind	India	IN	2.6
Japan	jpn	Japan	JA	4.3
Korea, Republic of	kor	Korea, Republic of	KO	4.7
Malaysia	mys	Malaysia	MA	5.1
Mexico	mex	Mexico	ME	2.8
Caribbean	xcb	Rest of Central America	RCA	5.1
Costa Rica	cri	Rest of Central America	RCA	1.2
Dominican Republic	dom	Rest of Central America	RCA	2.7
El Salvador	slv	Rest of Central America	RCA	1.7
Guatemala	gtm	Rest of Central America	RCA	1.2
Honduras	hnd	Rest of Central America	RCA	1.3
Jamaica	jam	Rest of Central America	RCA	5.1
Nicaragua	nic	Rest of Central America	RCA	1.4
Panama	pan	Rest of Central America	RCA	2.8
Puerto Rico	pri	Rest of Central America	RCA
Rest of Central America	xca	Rest of Central America	RCA
Trinidad and Tobago	tto	Rest of Central America	RCA	5.1
Mongolia	mng	Rest of East Asia	REA	5.1
Rest of East Asia	xea	Rest of East Asia	REA
Albania	alb	Rest of Europe	RE
Belarus	blr	Rest of Europe	RE	5.1
Norway	nor	Rest of Europe	RE	2.2
Rest of Eastern Europe	xee	Rest of Europe	RE	2.8
Rest of EFTA	xef	Rest of Europe	RE	1.9
Rest of Europe	xer	Rest of Europe	RE	5.1
Ukraine	ukr	Rest of Europe	RE	5.1
Egypt	egy	Rest of North Africa	RNA	3.3
Morocco	mar	Rest of North Africa	RNA	2.6
Rest of North Africa	xnf	Rest of North Africa	RNA	1.2
Tunisia	tun	Rest of North Africa	RNA	5.1
New Zealand	nzl	Rest of Oceania	RO	5.1
Rest of Oceania	xoc	Rest of Oceania	RO
Argentina	arg	Rest of South America	RSAM	5.1
Bolivia	bol	Rest of South America	RSAM	5.1
Chile	chl	Rest of South America	RSAM	5.1
Colombia	col	Rest of South America	RSAM	2.6
Ecuador	ecu	Rest of South America	RSAM	1.5
Paraguay	pry	Rest of South America	RSAM	5.1
Peru	per	Rest of South America	RSAM	1.2
Rest of South America	xsm	Rest of South America	RSAM	1.6
Uruguay	ury	Rest of South America	RSAM	5.1
Venezuela	ven	Rest of South America	RSAM	5.1
Bangladesh	bgd	Rest of South Asia	RSA	1.2
Nepal	npl	Rest of South Asia	RSA	1.2
Pakistan	pak	Rest of South Asia	RSA	1.2
Rest of South Asia	xsa	Rest of South Asia	RSA	1.2
Sri Lanka	lka	Rest of South Asia	RSA	1.2
Brunei Darussalam	brn	Rest of Southeast Asia	RSAS	5.1
Cambodia	khm	Rest of Southeast Asia	RSAS	1.2
Indonesia	idn	Rest of Southeast Asia	RSAS	2.5
Lao People's Democratic Republic	lao	Rest of Southeast Asia	RSAS	1.2
Philippines	phl	Rest of Southeast Asia	RSAS	1.2
Rest of Southeast Asia	xse	Rest of Southeast Asia	RSAS	1.2
Viet Nam	vnm	Rest of Southeast Asia	RSAS	5.1
Singapore	sgp	Rest of Southeast Asia	RSAS	5.1
Benin	ben	Rest of Sub-Saharan Africa	RSS	1.2
Botswana	bwa	Rest of Sub-Saharan Africa	RSS	5.1
Burkina Faso	bfa	Rest of Sub-Saharan Africa	RSS	1.2
Cameroon	cmr	Rest of Sub-Saharan Africa	RSS	1.2
Central Africa	xcf	Rest of Sub-Saharan Africa	RSS	1.2
Cote d'Ivoire	civ	Rest of Sub-Saharan Africa	RSS	1.2
Ethiopia	eth	Rest of Sub-Saharan Africa	RSS	1.2
Ghana	gha	Rest of Sub-Saharan Africa	RSS	1.2
Guinea	gin	Rest of Sub-Saharan Africa	RSS	1.2
Kenya	ken	Rest of Sub-Saharan Africa	RSS	1.2
Madagascar	mdg	Rest of Sub-Saharan Africa	RSS	1.2
Malawi	mwi	Rest of Sub-Saharan Africa	RSS	1.2
Mauritius	mus	Rest of Sub-Saharan Africa	RSS	4.9
Mozambique	moz	Rest of Sub-Saharan Africa	RSS	1.2
Namibia	nam	Rest of Sub-Saharan Africa	RSS	5.1
Nigeria	nga	Rest of Sub-Saharan Africa	RSS	1.2
Rest of Eastern Africa	xec	Rest of Sub-Saharan Africa	RSS	1.2
Rest of South African Customs Union	xsc	Rest of Sub-Saharan Africa	RSS	1.2
Rest of Western Africa	xwf	Rest of Sub-Saharan Africa	RSS	1.2
Rwanda	rwa	Rest of Sub-Saharan Africa	RSS	1.2
Senegal	sen	Rest of Sub-Saharan Africa	RSS	1.2
South Africa	zaf	Rest of Sub-Saharan Africa	RSS	5.1
South Central Africa	xac	Rest of Sub-Saharan Africa	RSS	1.2
Tanzania United Republic of	tza	Rest of Sub-Saharan Africa	RSS	1.2
Togo	tgo	Rest of Sub-Saharan Africa	RSS	1.2
Uganda	uga	Rest of Sub-Saharan Africa	RSS	1.2
Zambia	zmb	Rest of Sub-Saharan Africa	RSS	1.2
Zimbabwe	zwe	Rest of Sub-Saharan Africa	RSS
Rest of North America	xna	Rest of the World	RW
Rest of the World	xtw	Rest of the World	RW	1.7
Armenia	arm	Rest of Western Asia	RWA	5.1
Azerbaijan	aze	Rest of Western Asia	RWA	3.3
Bahrain	bhr	Rest of Western Asia	RWA	5.1
Georgia	geo	Rest of Western Asia	RWA	5.1
Iran Islamic Republic of	irn	Rest of Western Asia	RWA	5.1
Israel	isr	Rest of Western Asia	RWA	3.8
Jordan	jor	Rest of Western Asia	RWA	3
Kuwait	kwt	Rest of Western Asia	RWA	5.1
Oman	omn	Rest of Western Asia	RWA	5.1
Qatar	qat	Rest of Western Asia	RWA
Rest of Western Asia	xws	Rest of Western Asia	RWA	3.9
Saudi Arabia	sau	Rest of Western Asia	RWA	5.1
Turkey	tur	Rest of Western Asia	RWA	5.1
Russian Federation	rus	Russian Federation	RU	5.1
Switzerland	che	Switzerland	SW	1.6
Thailand	tha	Thailand	TH	5.1
United Arab Emirates	are	United Arab Emirates	UAE	4.4
United States of America	usa	United States of America	US	4

## Sheet: Sectors_Mapping
No.	Aggregated sector in GTAP-E (8)	Original sector in GTAP (65)
1	Agriculture	PDR, WHT, GRO, V_F, OSD, C_B, PFB, OCR, CTL, OAP, RMK, WOL, FRS, FSH
2	Coal	COA
3	Oil	OIL
4	Gas	GAS, GDT
5	Petroleum products	P_C
6	Electricity	ELY
7	Energy-intensive industries	OXT, CHM, BPH, RPP, NMM, I_S, NFM, FMP
8	Other industries	CMT, OMT, VOL, MIL, PCR, SGR, OFD, B_T, TEX, WAP, LEA, LUM, PPP, ELE, EEQ, OME, MVH, OTN, OMF, WTR, CNS, TRD, AFS, OTP, WTP, ATP, WHS, CMN, OFI, ISR, RSA, OBS, ROS, OSG, EDU, HHT, DWE
