# Supplementary material for: Contrasting suitability and ambition in regional carbon mitigation
Source: Nat Commun. 2022 Jul 14;13:4077. doi: 10.1038/s41467-022-31729-y (PMC9283498; doi:10.1038/s41467-022-31729-y)
Supplement: Supplementary file 5 — Supplementary Data 2 [file 41467_2022_31729_MOESM5_ESM.xlsx]

## Sheet: AIMCGE
Unit: %		SSP1-RCP1.9	SSP1-RCP2.6	SSP1-RCP3.4	SSP1-RCP4.5	SSP1-RCP6.0	SSP1-Baseline	SSP2-RCP1.9	SSP2-RCP2.6	SSP2-RCP3.4	SSP2-RCP4.5	SSP2-RCP6.0	SSP2-Baseline	SSP3-RCP1.9	SSP3-RCP2.6	SSP3-RCP3.4	SSP3-RCP4.5	SSP3-RCP6.0	SSP3-Baseline	SSP4-RCP1.9	SSP4-RCP2.6	SSP4-RCP3.4	SSP4-RCP4.5	SSP4-RCP6.0	SSP4-Baseline	SSP5-RCP1.9	SSP5-RCP2.6	SSP5-RCP3.4	SSP5-RCP4.5	SSP5-RCP6.0
Australia	OECD	-17.4403	-17.761	-17.761	-21.3374		-9.60409	-9.83685	-10.3791	-10.3791	-10.3791	-10.3791				-8.35543	-8.35543	-8.35543	-0.649171		-5.3291	-5.3291	-5.3291		-4.63463		-9.7128	-9.7128	-9.7128	-9.7128
Brazil	LAM	-11.9122	-11.907	-11.907	-11.6417		-11.1192														-7.27675	-7.27675	-7.27675		-6.29088		-1.21935	-1.21935	-1.21935	-1.21935
Canada	OECD	-17.4403	-17.761	-17.761	-21.3374		-9.60409	-9.83685	-10.3791	-10.3791	-10.3791	-10.3791				-8.35543	-8.35543	-8.35543	-0.649171		-5.3291	-5.3291	-5.3291		-4.63463		-9.7128	-9.7128	-9.7128	-9.7128
Central Asia	REF	-9.12057	-9.11652	-9.11652	-8.72095		-9.25778	-2.16214	-2.8837	-2.8837	-2.8837	-2.8837	-0.948121			-6.28991	-6.28991	-6.28991	-6.67388		-9.89369	-9.89369	-9.89369		-9.87279		-4.5477	-4.5477	-4.5477	-4.5477
China	ASIA	-15.9058	-15.9081	-15.9081	-15.7925		-14.824																				-0.978093	-0.978093	-0.978093	-0.978093
European Union	OECD	-17.4403	-17.761	-17.761	-21.3374		-9.60409	-9.83685	-10.3791	-10.3791	-10.3791	-10.3791				-8.35543	-8.35543	-8.35543	-0.649171		-5.3291	-5.3291	-5.3291		-4.63463		-9.7128	-9.7128	-9.7128	-9.7128
India	ASIA	-15.9058	-15.9081	-15.9081	-15.7925		-14.824																				-0.978093	-0.978093	-0.978093	-0.978093
Japan	OECD	-17.4403	-17.761	-17.761	-21.3374		-9.60409	-9.83685	-10.3791	-10.3791	-10.3791	-10.3791				-8.35543	-8.35543	-8.35543	-0.649171		-5.3291	-5.3291	-5.3291		-4.63463		-9.7128	-9.7128	-9.7128	-9.7128
Korea, Republic of	ASIA	-15.9058	-15.9081	-15.9081	-15.7925		-14.824																				-0.978093	-0.978093	-0.978093	-0.978093
Malaysia	ASIA	-15.9058	-15.9081	-15.9081	-15.7925		-14.824																				-0.978093	-0.978093	-0.978093	-0.978093
Mexico	LAM	-11.9122	-11.907	-11.907	-11.6417		-11.1192														-7.27675	-7.27675	-7.27675		-6.29088		-1.21935	-1.21935	-1.21935	-1.21935
Rest of Central America	LAM	-11.9122	-11.907	-11.907	-11.6417		-11.1192														-7.27675	-7.27675	-7.27675		-6.29088		-1.21935	-1.21935	-1.21935	-1.21935
Rest of East Asia	ASIA	-15.9058	-15.9081	-15.9081	-15.7925		-14.824																				-0.978093	-0.978093	-0.978093	-0.978093
Rest of Europe	REF	-9.12057	-9.11652	-9.11652	-8.72095		-9.25778	-2.16214	-2.8837	-2.8837	-2.8837	-2.8837	-0.948121			-6.28991	-6.28991	-6.28991	-6.67388		-9.89369	-9.89369	-9.89369		-9.87279		-4.5477	-4.5477	-4.5477	-4.5477
Rest of North Africa	MAF	-9.60127	-9.59782	-9.59782	-9.07509		-8.6875	-0.456007	-0.436415	-0.436415	-0.436415	-0.436415									-3.06379	-3.06379	-3.06379		-2.0197		-0.491354	-0.491354	-0.491354	-0.491354
Rest of Oceania	OECD	-17.4403	-17.761	-17.761	-21.3374		-9.60409	-9.83685	-10.3791	-10.3791	-10.3791	-10.3791				-8.35543	-8.35543	-8.35543	-0.649171		-5.3291	-5.3291	-5.3291		-4.63463		-9.7128	-9.7128	-9.7128	-9.7128
Rest of South America	LAM	-11.9122	-11.907	-11.907	-11.6417		-11.1192														-7.27675	-7.27675	-7.27675		-6.29088		-1.21935	-1.21935	-1.21935	-1.21935
Rest of South Asia	ASIA	-15.9058	-15.9081	-15.9081	-15.7925		-14.824																				-0.978093	-0.978093	-0.978093	-0.978093
Rest of Southeast Asia	ASIA	-15.9058	-15.9081	-15.9081	-15.7925		-14.824																				-0.978093	-0.978093	-0.978093	-0.978093
Rest of Sub-Saharan Africa	MAF	-9.60127	-9.59782	-9.59782	-9.07509		-8.6875	-0.456007	-0.436415	-0.436415	-0.436415	-0.436415									-3.06379	-3.06379	-3.06379		-2.0197		-0.491354	-0.491354	-0.491354	-0.491354
Rest of the World	\
Rest of Western Asia	MAF	-9.60127	-9.59782	-9.59782	-9.07509		-8.6875	-0.456007	-0.436415	-0.436415	-0.436415	-0.436415									-3.06379	-3.06379	-3.06379		-2.0197		-0.491354	-0.491354	-0.491354	-0.491354
Russian Federation	REF	-9.12057	-9.11652	-9.11652	-8.72095		-9.25778	-2.16214	-2.8837	-2.8837	-2.8837	-2.8837	-0.948121			-6.28991	-6.28991	-6.28991	-6.67388		-9.89369	-9.89369	-9.89369		-9.87279		-4.5477	-4.5477	-4.5477	-4.5477
Switzerland	OECD	-17.4403	-17.761	-17.761	-21.3374		-9.60409	-9.83685	-10.3791	-10.3791	-10.3791	-10.3791				-8.35543	-8.35543	-8.35543	-0.649171		-5.3291	-5.3291	-5.3291		-4.63463		-9.7128	-9.7128	-9.7128	-9.7128
Thailand	ASIA	-15.9058	-15.9081	-15.9081	-15.7925		-14.824																				-0.978093	-0.978093	-0.978093	-0.978093
United Arab Emirates	MAF	-9.60127	-9.59782	-9.59782	-9.07509		-8.6875	-0.456007	-0.436415	-0.436415	-0.436415	-0.436415									-3.06379	-3.06379	-3.06379		-2.0197		-0.491354	-0.491354	-0.491354	-0.491354
United States of America	OECD	-17.4403	-17.761	-17.761	-21.3374		-9.60409	-9.83685	-10.3791	-10.3791	-10.3791	-10.3791				-8.35543	-8.35543	-8.35543	-0.649171		-5.3291	-5.3291	-5.3291		-4.63463		-9.7128	-9.7128	-9.7128	-9.7128

## Sheet: GCAM4
Unit: %		SSP1-RCP1.9	SSP1-RCP2.6	SSP1-RCP3.4	SSP1-RCP4.5	SSP1-RCP6.0	SSP1-Baseline	SSP2-RCP1.9	SSP2-RCP2.6	SSP2-RCP3.4	SSP2-RCP4.5	SSP2-RCP6.0	SSP2-Baseline	SSP3-RCP1.9	SSP3-RCP2.6	SSP3-RCP3.4	SSP3-RCP4.5	SSP3-RCP6.0	SSP3-Baseline	SSP4-RCP1.9	SSP4-RCP2.6	SSP4-RCP3.4	SSP4-RCP4.5	SSP4-RCP6.0	SSP4-Baseline	SSP5-RCP1.9	SSP5-RCP2.6	SSP5-RCP3.4	SSP5-RCP4.5	SSP5-RCP6.0
Australia	OECD	-13.6473	-13.738	-13.738	-13.738		-8.34578	-10.2748	-10.3208	-10.3208	-10.3208	-10.3208	-4.07144						-3.57132		-11.7253	-11.7253	-11.7253	-11.7253	-5.47376	-6.90372	-6.99346	-6.99346	-6.99346	-6.99346
Brazil	LAM	-18.3319	-18.4466	-18.4466	-18.4466		-8.87054	-12.8605	-12.9303	-12.9304	-12.9304	-12.9304	-1.67788								-14.5954	-14.5954	-14.5954	-14.5954	-3.81376	-11.4904	-11.6235	-11.6235	-11.6235	-11.6235
Canada	OECD	-13.6473	-13.738	-13.738	-13.738		-8.34578	-10.2748	-10.3208	-10.3208	-10.3208	-10.3208	-4.07144						-3.57132		-11.7253	-11.7253	-11.7253	-11.7253	-5.47376	-6.90372	-6.99346	-6.99346	-6.99346	-6.99346
Central Asia	REF	-6.80335	-6.84905	-6.84905	-6.84905		-4.85119	-4.94205	-4.9663	-4.9663	-4.9663	-4.9663	-2.45544								-6.91334	-6.91335	-6.91335	-6.91335	-4.34335	-2.46015	-2.50722	-2.50723	-2.50723	-2.50723
China	ASIA	-11.2001	-11.2108	-11.2108	-11.2108		-9.85614	-3.87545	-3.87753	-3.87753	-3.87753	-3.87753	-2.19859								-5.60148	-5.60148	-5.60148	-5.60148	-3.93072	-1.83679	-1.84973	-1.84973	-1.84973	-1.84973
European Union	OECD	-13.6473	-13.738	-13.738	-13.738		-8.34578	-10.2748	-10.3208	-10.3208	-10.3208	-10.3208	-4.07144						-3.57132		-11.7253	-11.7253	-11.7253	-11.7253	-5.47376	-6.90372	-6.99346	-6.99346	-6.99346	-6.99346
India	ASIA	-11.2001	-11.2108	-11.2108	-11.2108		-9.85614	-3.87545	-3.87753	-3.87753	-3.87753	-3.87753	-2.19859								-5.60148	-5.60148	-5.60148	-5.60148	-3.93072	-1.83679	-1.84973	-1.84973	-1.84973	-1.84973
Japan	OECD	-13.6473	-13.738	-13.738	-13.738		-8.34578	-10.2748	-10.3208	-10.3208	-10.3208	-10.3208	-4.07144						-3.57132		-11.7253	-11.7253	-11.7253	-11.7253	-5.47376	-6.90372	-6.99346	-6.99346	-6.99346	-6.99346
Korea, Republic of	ASIA	-11.2001	-11.2108	-11.2108	-11.2108		-9.85614	-3.87545	-3.87753	-3.87753	-3.87753	-3.87753	-2.19859								-5.60148	-5.60148	-5.60148	-5.60148	-3.93072	-1.83679	-1.84973	-1.84973	-1.84973	-1.84973
Malaysia	ASIA	-11.2001	-11.2108	-11.2108	-11.2108		-9.85614	-3.87545	-3.87753	-3.87753	-3.87753	-3.87753	-2.19859								-5.60148	-5.60148	-5.60148	-5.60148	-3.93072	-1.83679	-1.84973	-1.84973	-1.84973	-1.84973
Mexico	LAM	-18.3319	-18.4466	-18.4466	-18.4466		-8.87054	-12.8605	-12.9303	-12.9304	-12.9304	-12.9304	-1.67788								-14.5954	-14.5954	-14.5954	-14.5954	-3.81376	-11.4904	-11.6235	-11.6235	-11.6235	-11.6235
Rest of Central America	LAM	-18.3319	-18.4466	-18.4466	-18.4466		-8.87054	-12.8605	-12.9303	-12.9304	-12.9304	-12.9304	-1.67788								-14.5954	-14.5954	-14.5954	-14.5954	-3.81376	-11.4904	-11.6235	-11.6235	-11.6235	-11.6235
Rest of East Asia	ASIA	-11.2001	-11.2108	-11.2108	-11.2108		-9.85614	-3.87545	-3.87753	-3.87753	-3.87753	-3.87753	-2.19859								-5.60148	-5.60148	-5.60148	-5.60148	-3.93072	-1.83679	-1.84973	-1.84973	-1.84973	-1.84973
Rest of Europe	REF	-6.80335	-6.84905	-6.84905	-6.84905		-4.85119	-4.94205	-4.9663	-4.9663	-4.9663	-4.9663	-2.45544								-6.91334	-6.91335	-6.91335	-6.91335	-4.34335	-2.46015	-2.50722	-2.50723	-2.50723	-2.50723
Rest of North Africa	MAF	-13.3152	-13.4095	-13.4095	-13.4095		-8.25142	-8.55738	-8.61725	-8.61725	-8.61725	-8.61725	-2.61433						-1.71805		-9.64844	-9.64845	-9.64845	-9.64845	-3.67359	-6.37599	-6.4899	-6.4899	-6.4899	-6.48991
Rest of Oceania	OECD	-13.6473	-13.738	-13.738	-13.738		-8.34578	-10.2748	-10.3208	-10.3208	-10.3208	-10.3208	-4.07144						-3.57132		-11.7253	-11.7253	-11.7253	-11.7253	-5.47376	-6.90372	-6.99346	-6.99346	-6.99346	-6.99346
Rest of South America	LAM	-18.3319	-18.4466	-18.4466	-18.4466		-8.87054	-12.8605	-12.9303	-12.9304	-12.9304	-12.9304	-1.67788								-14.5954	-14.5954	-14.5954	-14.5954	-3.81376	-11.4904	-11.6235	-11.6235	-11.6235	-11.6235
Rest of South Asia	ASIA	-11.2001	-11.2108	-11.2108	-11.2108		-9.85614	-3.87545	-3.87753	-3.87753	-3.87753	-3.87753	-2.19859								-5.60148	-5.60148	-5.60148	-5.60148	-3.93072	-1.83679	-1.84973	-1.84973	-1.84973	-1.84973
Rest of Southeast Asia	ASIA	-11.2001	-11.2108	-11.2108	-11.2108		-9.85614	-3.87545	-3.87753	-3.87753	-3.87753	-3.87753	-2.19859								-5.60148	-5.60148	-5.60148	-5.60148	-3.93072	-1.83679	-1.84973	-1.84973	-1.84973	-1.84973
Rest of Sub-Saharan Africa	MAF	-13.3152	-13.4095	-13.4095	-13.4095		-8.25142	-8.55738	-8.61725	-8.61725	-8.61725	-8.61725	-2.61433						-1.71805		-9.64844	-9.64845	-9.64845	-9.64845	-3.67359	-6.37599	-6.4899	-6.4899	-6.4899	-6.48991
Rest of the World	\
Rest of Western Asia	MAF	-13.3152	-13.4095	-13.4095	-13.4095		-8.25142	-8.55738	-8.61725	-8.61725	-8.61725	-8.61725	-2.61433						-1.71805		-9.64844	-9.64845	-9.64845	-9.64845	-3.67359	-6.37599	-6.4899	-6.4899	-6.4899	-6.48991
Russian Federation	REF	-6.80335	-6.84905	-6.84905	-6.84905		-4.85119	-4.94205	-4.9663	-4.9663	-4.9663	-4.9663	-2.45544								-6.91334	-6.91335	-6.91335	-6.91335	-4.34335	-2.46015	-2.50722	-2.50723	-2.50723	-2.50723
Switzerland	OECD	-13.6473	-13.738	-13.738	-13.738		-8.34578	-10.2748	-10.3208	-10.3208	-10.3208	-10.3208	-4.07144						-3.57132		-11.7253	-11.7253	-11.7253	-11.7253	-5.47376	-6.90372	-6.99346	-6.99346	-6.99346	-6.99346
Thailand	ASIA	-11.2001	-11.2108	-11.2108	-11.2108		-9.85614	-3.87545	-3.87753	-3.87753	-3.87753	-3.87753	-2.19859								-5.60148	-5.60148	-5.60148	-5.60148	-3.93072	-1.83679	-1.84973	-1.84973	-1.84973	-1.84973
United Arab Emirates	MAF	-13.3152	-13.4095	-13.4095	-13.4095		-8.25142	-8.55738	-8.61725	-8.61725	-8.61725	-8.61725	-2.61433						-1.71805		-9.64844	-9.64845	-9.64845	-9.64845	-3.67359	-6.37599	-6.4899	-6.4899	-6.4899	-6.48991
United States of America	OECD	-13.6473	-13.738	-13.738	-13.738		-8.34578	-10.2748	-10.3208	-10.3208	-10.3208	-10.3208	-4.07144						-3.57132		-11.7253	-11.7253	-11.7253	-11.7253	-5.47376	-6.90372	-6.99346	-6.99346	-6.99346	-6.99346

## Sheet: REMIND
Unit: %		SSP1-RCP1.9	SSP1-RCP2.6	SSP1-RCP3.4	SSP1-RCP4.5	SSP1-RCP6.0	SSP1-Baseline	SSP2-RCP1.9	SSP2-RCP2.6	SSP2-RCP3.4	SSP2-RCP4.5	SSP2-RCP6.0	SSP2-Baseline	SSP3-RCP1.9	SSP3-RCP2.6	SSP3-RCP3.4	SSP3-RCP4.5	SSP3-RCP6.0	SSP3-Baseline	SSP4-RCP1.9	SSP4-RCP2.6	SSP4-RCP3.4	SSP4-RCP4.5	SSP4-RCP6.0	SSP4-Baseline	SSP5-RCP1.9	SSP5-RCP2.6	SSP5-RCP3.4	SSP5-RCP4.5	SSP5-RCP6.0
Australia	OECD	-16.7945	-16.7945	-16.7945	-16.7945		-11.9131	-9.38284	-9.38284	-9.38284	-9.38284	-9.38284	-4.96022													-4.74518	-4.74518	-4.74518	-4.74518	-4.74518
Brazil	LAM	-20.4442	-20.4442	-20.4442	-20.4442		-19.4016	-5.21305	-5.21305	-5.21305	-5.21305	-5.21305	-3.35449													-0.589302	-0.589302	-0.589302	-0.589302	-0.589302
Canada	OECD	-16.7945	-16.7945	-16.7945	-16.7945		-11.9131	-9.38284	-9.38284	-9.38284	-9.38284	-9.38284	-4.96022													-4.74518	-4.74518	-4.74518	-4.74518	-4.74518
Central Asia	REF	-16.5509	-16.5509	-16.5509	-16.5509		-15.0347	-11.434	-11.434	-11.434	-11.434	-11.434	-10.4232													-2.21099	-2.21099	-2.21099	-2.21099	-2.21099
China	ASIA	-11.3654	-11.3654	-11.3654	-11.3654		-9.32118																			-2.48525	-2.48525	-2.48525	-2.48525	-2.48525
European Union	OECD	-16.7945	-16.7945	-16.7945	-16.7945		-11.9131	-9.38284	-9.38284	-9.38284	-9.38284	-9.38284	-4.96022													-4.74518	-4.74518	-4.74518	-4.74518	-4.74518
India	ASIA	-11.3654	-11.3654	-11.3654	-11.3654		-9.32118																			-2.48525	-2.48525	-2.48525	-2.48525	-2.48525
Japan	OECD	-16.7945	-16.7945	-16.7945	-16.7945		-11.9131	-9.38284	-9.38284	-9.38284	-9.38284	-9.38284	-4.96022													-4.74518	-4.74518	-4.74518	-4.74518	-4.74518
Korea, Republic of	ASIA	-11.3654	-11.3654	-11.3654	-11.3654		-9.32118																			-2.48525	-2.48525	-2.48525	-2.48525	-2.48525
Malaysia	ASIA	-11.3654	-11.3654	-11.3654	-11.3654		-9.32118																			-2.48525	-2.48525	-2.48525	-2.48525	-2.48525
Mexico	LAM	-20.4442	-20.4442	-20.4442	-20.4442		-19.4016	-5.21305	-5.21305	-5.21305	-5.21305	-5.21305	-3.35449													-0.589302	-0.589302	-0.589302	-0.589302	-0.589302
Rest of Central America	LAM	-20.4442	-20.4442	-20.4442	-20.4442		-19.4016	-5.21305	-5.21305	-5.21305	-5.21305	-5.21305	-3.35449													-0.589302	-0.589302	-0.589302	-0.589302	-0.589302
Rest of East Asia	ASIA	-11.3654	-11.3654	-11.3654	-11.3654		-9.32118																			-2.48525	-2.48525	-2.48525	-2.48525	-2.48525
Rest of Europe	REF	-16.5509	-16.5509	-16.5509	-16.5509		-15.0347	-11.434	-11.434	-11.434	-11.434	-11.434	-10.4232													-2.21099	-2.21099	-2.21099	-2.21099	-2.21099
Rest of North Africa	MAF	-21.9512	-21.9512	-21.9512	-21.9512		-22.6813	-3.30243	-3.30243	-3.30243	-3.30243	-3.30243	-4.03653													-0.855449	-0.855449	-0.855449	-0.855449	-0.855449
Rest of Oceania	OECD	-16.7945	-16.7945	-16.7945	-16.7945		-11.9131	-9.38284	-9.38284	-9.38284	-9.38284	-9.38284	-4.96022													-4.74518	-4.74518	-4.74518	-4.74518	-4.74518
Rest of South America	LAM	-20.4442	-20.4442	-20.4442	-20.4442		-19.4016	-5.21305	-5.21305	-5.21305	-5.21305	-5.21305	-3.35449													-0.589302	-0.589302	-0.589302	-0.589302	-0.589302
Rest of South Asia	ASIA	-11.3654	-11.3654	-11.3654	-11.3654		-9.32118																			-2.48525	-2.48525	-2.48525	-2.48525	-2.48525
Rest of Southeast Asia	ASIA	-11.3654	-11.3654	-11.3654	-11.3654		-9.32118																			-2.48525	-2.48525	-2.48525	-2.48525	-2.48525
Rest of Sub-Saharan Africa	MAF	-21.9512	-21.9512	-21.9512	-21.9512		-22.6813	-3.30243	-3.30243	-3.30243	-3.30243	-3.30243	-4.03653													-0.855449	-0.855449	-0.855449	-0.855449	-0.855449
Rest of the World	\
Rest of Western Asia	MAF	-21.9512	-21.9512	-21.9512	-21.9512		-22.6813	-3.30243	-3.30243	-3.30243	-3.30243	-3.30243	-4.03653													-0.855449	-0.855449	-0.855449	-0.855449	-0.855449
Russian Federation	REF	-16.5509	-16.5509	-16.5509	-16.5509		-15.0347	-11.434	-11.434	-11.434	-11.434	-11.434	-10.4232													-2.21099	-2.21099	-2.21099	-2.21099	-2.21099
Switzerland	OECD	-16.7945	-16.7945	-16.7945	-16.7945		-11.9131	-9.38284	-9.38284	-9.38284	-9.38284	-9.38284	-4.96022													-4.74518	-4.74518	-4.74518	-4.74518	-4.74518
Thailand	ASIA	-11.3654	-11.3654	-11.3654	-11.3654		-9.32118																			-2.48525	-2.48525	-2.48525	-2.48525	-2.48525
United Arab Emirates	MAF	-21.9512	-21.9512	-21.9512	-21.9512		-22.6813	-3.30243	-3.30243	-3.30243	-3.30243	-3.30243	-4.03653													-0.855449	-0.855449	-0.855449	-0.855449	-0.855449
United States of America	OECD	-16.7945	-16.7945	-16.7945	-16.7945		-11.9131	-9.38284	-9.38284	-9.38284	-9.38284	-9.38284	-4.96022													-4.74518	-4.74518	-4.74518	-4.74518	-4.74518

## Sheet: IMAGE
Unit: %		SSP1-RCP1.9	SSP1-RCP2.6	SSP1-RCP3.4	SSP1-RCP4.5	SSP1-RCP6.0	SSP1-Baseline	SSP2-RCP1.9	SSP2-RCP2.6	SSP2-RCP3.4	SSP2-RCP4.5	SSP2-RCP6.0	SSP2-Baseline	SSP3-RCP1.9	SSP3-RCP2.6	SSP3-RCP3.4	SSP3-RCP4.5	SSP3-RCP6.0	SSP3-Baseline	SSP4-RCP1.9	SSP4-RCP2.6	SSP4-RCP3.4	SSP4-RCP4.5	SSP4-RCP6.0	SSP4-Baseline	SSP5-RCP1.9	SSP5-RCP2.6	SSP5-RCP3.4	SSP5-RCP4.5	SSP5-RCP6.0
Australia	OECD	-21.2562	-11.0285	-8.88129	-8.93011		-8.82818		-15.3402	-12.7977	-10.6461	-8.73646	-5.91735			-11.6932	-9.15902	-5.70824	-4.74576		-16.2744	-11.7023	-11.3445	-11.3016	-9.00035			-6.57406	-4.77126	-4.266
Brazil	LAM	-30.8702	-15.0454	-11.5743	-11.5625		-11.8513		-9.30493	-8.53068	-8.04529	-7.91266	-7.87971			-3.66557	-1.60475	-0.573371	-0.467444		-22.2586	-13.0921	-9.80608	-9.78495	-9.75739			-7.18407	-3.40529	-0.518163
Canada	OECD	-21.2562	-11.0285	-8.88129	-8.93011		-8.82818		-15.3402	-12.7977	-10.6461	-8.73646	-5.91735			-11.6932	-9.15902	-5.70824	-4.74576		-16.2744	-11.7023	-11.3445	-11.3016	-9.00035			-6.57406	-4.77126	-4.266
Central Asia	REF	-22.8812	-10.4523	-7.51858	-7.49575		-7.48433		-10.0861	-7.59675	-7.38317	-7.27596	-7.2637			-2.70165	-1.1378	-0.934585	-0.913168		-21.772	-11.4861	-11.0735	-11.0595	-10.9098			-0.267428
China	ASIA	-26.4177	-12.1973	-9.11705	-9.11613		-9.08526		-10.0956	-6.35682	-4.89107	-4.30171	-4.08901			-5.71845	-3.35954	-1.98969	-1.94449		-20.9262	-12.0609	-10.7818	-10.7288	-10.3985			-2.00784	-1.29797	-0.516883
European Union	OECD	-21.2562	-11.0285	-8.88129	-8.93011		-8.82818		-15.3402	-12.7977	-10.6461	-8.73646	-5.91735			-11.6932	-9.15902	-5.70824	-4.74576		-16.2744	-11.7023	-11.3445	-11.3016	-9.00035			-6.57406	-4.77126	-4.266
India	ASIA	-26.4177	-12.1973	-9.11705	-9.11613		-9.08526		-10.0956	-6.35682	-4.89107	-4.30171	-4.08901			-5.71845	-3.35954	-1.98969	-1.94449		-20.9262	-12.0609	-10.7818	-10.7288	-10.3985			-2.00784	-1.29797	-0.516883
Japan	OECD	-21.2562	-11.0285	-8.88129	-8.93011		-8.82818		-15.3402	-12.7977	-10.6461	-8.73646	-5.91735			-11.6932	-9.15902	-5.70824	-4.74576		-16.2744	-11.7023	-11.3445	-11.3016	-9.00035			-6.57406	-4.77126	-4.266
Korea, Republic of	ASIA	-26.4177	-12.1973	-9.11705	-9.11613		-9.08526		-10.0956	-6.35682	-4.89107	-4.30171	-4.08901			-5.71845	-3.35954	-1.98969	-1.94449		-20.9262	-12.0609	-10.7818	-10.7288	-10.3985			-2.00784	-1.29797	-0.516883
Malaysia	ASIA	-26.4177	-12.1973	-9.11705	-9.11613		-9.08526		-10.0956	-6.35682	-4.89107	-4.30171	-4.08901			-5.71845	-3.35954	-1.98969	-1.94449		-20.9262	-12.0609	-10.7818	-10.7288	-10.3985			-2.00784	-1.29797	-0.516883
Mexico	LAM	-30.8702	-15.0454	-11.5743	-11.5625		-11.8513		-9.30493	-8.53068	-8.04529	-7.91266	-7.87971			-3.66557	-1.60475	-0.573371	-0.467444		-22.2586	-13.0921	-9.80608	-9.78495	-9.75739			-7.18407	-3.40529	-0.518163
Rest of Central America	LAM	-30.8702	-15.0454	-11.5743	-11.5625		-11.8513		-9.30493	-8.53068	-8.04529	-7.91266	-7.87971			-3.66557	-1.60475	-0.573371	-0.467444		-22.2586	-13.0921	-9.80608	-9.78495	-9.75739			-7.18407	-3.40529	-0.518163
Rest of East Asia	ASIA	-26.4177	-12.1973	-9.11705	-9.11613		-9.08526		-10.0956	-6.35682	-4.89107	-4.30171	-4.08901			-5.71845	-3.35954	-1.98969	-1.94449		-20.9262	-12.0609	-10.7818	-10.7288	-10.3985			-2.00784	-1.29797	-0.516883
Rest of Europe	REF	-22.8812	-10.4523	-7.51858	-7.49575		-7.48433		-10.0861	-7.59675	-7.38317	-7.27596	-7.2637			-2.70165	-1.1378	-0.934585	-0.913168		-21.772	-11.4861	-11.0735	-11.0595	-10.9098			-0.267428
Rest of North Africa	MAF	-24.8975	-11.503	-8.34097	-8.31383		-8.27312		-18.2339	-12.9041	-10.1265	-8.77133	-8.70067			-9.12841	-5.2199	-3.44459	-3.4209		-17.1311	-7.37477	-4.50558	-4.39963	-4.15035			-5.22853	-1.32773	-0.30969
Rest of Oceania	OECD	-21.2562	-11.0285	-8.88129	-8.93011		-8.82818		-15.3402	-12.7977	-10.6461	-8.73646	-5.91735			-11.6932	-9.15902	-5.70824	-4.74576		-16.2744	-11.7023	-11.3445	-11.3016	-9.00035			-6.57406	-4.77126	-4.266
Rest of South America	LAM	-30.8702	-15.0454	-11.5743	-11.5625		-11.8513		-9.30493	-8.53068	-8.04529	-7.91266	-7.87971			-3.66557	-1.60475	-0.573371	-0.467444		-22.2586	-13.0921	-9.80608	-9.78495	-9.75739			-7.18407	-3.40529	-0.518163
Rest of South Asia	ASIA	-26.4177	-12.1973	-9.11705	-9.11613		-9.08526		-10.0956	-6.35682	-4.89107	-4.30171	-4.08901			-5.71845	-3.35954	-1.98969	-1.94449		-20.9262	-12.0609	-10.7818	-10.7288	-10.3985			-2.00784	-1.29797	-0.516883
Rest of Southeast Asia	ASIA	-26.4177	-12.1973	-9.11705	-9.11613		-9.08526		-10.0956	-6.35682	-4.89107	-4.30171	-4.08901			-5.71845	-3.35954	-1.98969	-1.94449		-20.9262	-12.0609	-10.7818	-10.7288	-10.3985			-2.00784	-1.29797	-0.516883
Rest of Sub-Saharan Africa	MAF	-24.8975	-11.503	-8.34097	-8.31383		-8.27312		-18.2339	-12.9041	-10.1265	-8.77133	-8.70067			-9.12841	-5.2199	-3.44459	-3.4209		-17.1311	-7.37477	-4.50558	-4.39963	-4.15035			-5.22853	-1.32773	-0.30969
Rest of the World	\
Rest of Western Asia	MAF	-24.8975	-11.503	-8.34097	-8.31383		-8.27312		-18.2339	-12.9041	-10.1265	-8.77133	-8.70067			-9.12841	-5.2199	-3.44459	-3.4209		-17.1311	-7.37477	-4.50558	-4.39963	-4.15035			-5.22853	-1.32773	-0.30969
Russian Federation	REF	-22.8812	-10.4523	-7.51858	-7.49575		-7.48433		-10.0861	-7.59675	-7.38317	-7.27596	-7.2637			-2.70165	-1.1378	-0.934585	-0.913168		-21.772	-11.4861	-11.0735	-11.0595	-10.9098			-0.267428
Switzerland	OECD	-21.2562	-11.0285	-8.88129	-8.93011		-8.82818		-15.3402	-12.7977	-10.6461	-8.73646	-5.91735			-11.6932	-9.15902	-5.70824	-4.74576		-16.2744	-11.7023	-11.3445	-11.3016	-9.00035			-6.57406	-4.77126	-4.266
Thailand	ASIA	-26.4177	-12.1973	-9.11705	-9.11613		-9.08526		-10.0956	-6.35682	-4.89107	-4.30171	-4.08901			-5.71845	-3.35954	-1.98969	-1.94449		-20.9262	-12.0609	-10.7818	-10.7288	-10.3985			-2.00784	-1.29797	-0.516883
United Arab Emirates	MAF	-24.8975	-11.503	-8.34097	-8.31383		-8.27312		-18.2339	-12.9041	-10.1265	-8.77133	-8.70067			-9.12841	-5.2199	-3.44459	-3.4209		-17.1311	-7.37477	-4.50558	-4.39963	-4.15035			-5.22853	-1.32773	-0.30969
United States of America	OECD	-21.2562	-11.0285	-8.88129	-8.93011		-8.82818		-15.3402	-12.7977	-10.6461	-8.73646	-5.91735			-11.6932	-9.15902	-5.70824	-4.74576		-16.2744	-11.7023	-11.3445	-11.3016	-9.00035			-6.57406	-4.77126	-4.266

## Sheet: WITCH
Unit: %		SSP1-RCP1.9	SSP1-RCP2.6	SSP1-RCP3.4	SSP1-RCP4.5	SSP1-RCP6.0	SSP1-Baseline	SSP2-RCP1.9	SSP2-RCP2.6	SSP2-RCP3.4	SSP2-RCP4.5	SSP2-RCP6.0	SSP2-Baseline	SSP3-RCP1.9	SSP3-RCP2.6	SSP3-RCP3.4	SSP3-RCP4.5	SSP3-RCP6.0	SSP3-Baseline	SSP4-RCP1.9	SSP4-RCP2.6	SSP4-RCP3.4	SSP4-RCP4.5	SSP4-RCP6.0	SSP4-Baseline	SSP5-RCP1.9	SSP5-RCP2.6	SSP5-RCP3.4	SSP5-RCP4.5	SSP5-RCP6.0
Australia	OECD	-21.8334	-23.5583	-22.0381	-21.9108		-7.58514		-18.3598	-15.4243	-14.8551	-14.4511	-1.62703			-13.4278	-10.7961	-10.5465		-16.3851	-17.2948	-16.1983	-16.2756	-15.7322	-3.2956			-17.0226	-14.6851	-13.4313
Brazil	LAM	-15.1209	-10.0368	-7.06588	-7.18204		-2.97621		-2.54476							-5.46047				-8.32235	-1.11151		-0.353602	-1.85486				-6.66629	-6.23854	-3.41083
Canada	OECD	-21.8334	-23.5583	-22.0381	-21.9108		-7.58514		-18.3598	-15.4243	-14.8551	-14.4511	-1.62703			-13.4278	-10.7961	-10.5465		-16.3851	-17.2948	-16.1983	-16.2756	-15.7322	-3.2956			-17.0226	-14.6851	-13.4313
Central Asia	REF	-28.2299	-23.3798	-18.1148	-18.8788		-15.4591		-19.1006	-9.67831	-8.02945	-8.39788	-7.51838			-2.30644				-21.6185	-14.9054	-11.1764	-12.149	-13.3273	-8.93664			-13.7923	-6.6664	-3.58371
China	ASIA	-9.69698			-1.66682		-5.25062		-16.2343	-9.7877	-5.29576	-4.2637				-11.5429				-6.43471					-1.98345			-15.8056	-9.37688	-5.61418
European Union	OECD	-21.8334	-23.5583	-22.0381	-21.9108		-7.58514		-18.3598	-15.4243	-14.8551	-14.4511	-1.62703			-13.4278	-10.7961	-10.5465		-16.3851	-17.2948	-16.1983	-16.2756	-15.7322	-3.2956			-17.0226	-14.6851	-13.4313
India	ASIA	-9.69698			-1.66682		-5.25062		-16.2343	-9.7877	-5.29576	-4.2637				-11.5429				-6.43471					-1.98345			-15.8056	-9.37688	-5.61418
Japan	OECD	-21.8334	-23.5583	-22.0381	-21.9108		-7.58514		-18.3598	-15.4243	-14.8551	-14.4511	-1.62703			-13.4278	-10.7961	-10.5465		-16.3851	-17.2948	-16.1983	-16.2756	-15.7322	-3.2956			-17.0226	-14.6851	-13.4313
Korea, Republic of	ASIA	-9.69698			-1.66682		-5.25062		-16.2343	-9.7877	-5.29576	-4.2637				-11.5429				-6.43471					-1.98345			-15.8056	-9.37688	-5.61418
Malaysia	ASIA	-9.69698			-1.66682		-5.25062		-16.2343	-9.7877	-5.29576	-4.2637				-11.5429				-6.43471					-1.98345			-15.8056	-9.37688	-5.61418
Mexico	LAM	-15.1209	-10.0368	-7.06588	-7.18204		-2.97621		-2.54476							-5.46047				-8.32235	-1.11151		-0.353602	-1.85486				-6.66629	-6.23854	-3.41083
Rest of Central America	LAM	-15.1209	-10.0368	-7.06588	-7.18204		-2.97621		-2.54476							-5.46047				-8.32235	-1.11151		-0.353602	-1.85486				-6.66629	-6.23854	-3.41083
Rest of East Asia	ASIA	-9.69698			-1.66682		-5.25062		-16.2343	-9.7877	-5.29576	-4.2637				-11.5429				-6.43471					-1.98345			-15.8056	-9.37688	-5.61418
Rest of Europe	REF	-28.2299	-23.3798	-18.1148	-18.8788		-15.4591		-19.1006	-9.67831	-8.02945	-8.39788	-7.51838			-2.30644				-21.6185	-14.9054	-11.1764	-12.149	-13.3273	-8.93664			-13.7923	-6.6664	-3.58371
Rest of North Africa	MAF	-19.7502	-13.8458	-8.83996	-10.2827		-7.02994		-14.2893	-6.46766	-5.16249	-5.61398	-4.0587			-21.4831	-0.34867			-14.4746	-4.50888	-2.81737	-5.19808	-8.03937	-2.87626			-14.9039	-6.17282	-5.2448
Rest of Oceania	OECD	-21.8334	-23.5583	-22.0381	-21.9108		-7.58514		-18.3598	-15.4243	-14.8551	-14.4511	-1.62703			-13.4278	-10.7961	-10.5465		-16.3851	-17.2948	-16.1983	-16.2756	-15.7322	-3.2956			-17.0226	-14.6851	-13.4313
Rest of South America	LAM	-15.1209	-10.0368	-7.06588	-7.18204		-2.97621		-2.54476							-5.46047				-8.32235	-1.11151		-0.353602	-1.85486				-6.66629	-6.23854	-3.41083
Rest of South Asia	ASIA	-9.69698			-1.66682		-5.25062		-16.2343	-9.7877	-5.29576	-4.2637				-11.5429				-6.43471					-1.98345			-15.8056	-9.37688	-5.61418
Rest of Southeast Asia	ASIA	-9.69698			-1.66682		-5.25062		-16.2343	-9.7877	-5.29576	-4.2637				-11.5429				-6.43471					-1.98345			-15.8056	-9.37688	-5.61418
Rest of Sub-Saharan Africa	MAF	-19.7502	-13.8458	-8.83996	-10.2827		-7.02994		-14.2893	-6.46766	-5.16249	-5.61398	-4.0587			-21.4831	-0.34867			-14.4746	-4.50888	-2.81737	-5.19808	-8.03937	-2.87626			-14.9039	-6.17282	-5.2448
Rest of the World	\
Rest of Western Asia	MAF	-19.7502	-13.8458	-8.83996	-10.2827		-7.02994		-14.2893	-6.46766	-5.16249	-5.61398	-4.0587			-21.4831	-0.34867			-14.4746	-4.50888	-2.81737	-5.19808	-8.03937	-2.87626			-14.9039	-6.17282	-5.2448
Russian Federation	REF	-28.2299	-23.3798	-18.1148	-18.8788		-15.4591		-19.1006	-9.67831	-8.02945	-8.39788	-7.51838			-2.30644				-21.6185	-14.9054	-11.1764	-12.149	-13.3273	-8.93664			-13.7923	-6.6664	-3.58371
Switzerland	OECD	-21.8334	-23.5583	-22.0381	-21.9108		-7.58514		-18.3598	-15.4243	-14.8551	-14.4511	-1.62703			-13.4278	-10.7961	-10.5465		-16.3851	-17.2948	-16.1983	-16.2756	-15.7322	-3.2956			-17.0226	-14.6851	-13.4313
Thailand	ASIA	-9.69698			-1.66682		-5.25062		-16.2343	-9.7877	-5.29576	-4.2637				-11.5429				-6.43471					-1.98345			-15.8056	-9.37688	-5.61418
United Arab Emirates	MAF	-19.7502	-13.8458	-8.83996	-10.2827		-7.02994		-14.2893	-6.46766	-5.16249	-5.61398	-4.0587			-21.4831	-0.34867			-14.4746	-4.50888	-2.81737	-5.19808	-8.03937	-2.87626			-14.9039	-6.17282	-5.2448
United States of America	OECD	-21.8334	-23.5583	-22.0381	-21.9108		-7.58514		-18.3598	-15.4243	-14.8551	-14.4511	-1.62703			-13.4278	-10.7961	-10.5465		-16.3851	-17.2948	-16.1983	-16.2756	-15.7322	-3.2956			-17.0226	-14.6851	-13.4313
