# Supplementary material for: Contrasting suitability and ambition in regional carbon mitigation
Source: Nat Commun. 2022 Jul 14;13:4077. doi: 10.1038/s41467-022-31729-y (PMC9283498; doi:10.1038/s41467-022-31729-y)
Supplement: Supplementary file 6 — Supplementary Data 3 [file 41467_2022_31729_MOESM6_ESM.xlsx]

## Sheet: AIMCGE
Reduction cost of carbon. Unit: US$ per tCO2		SSP1-RCP1.9	SSP1-RCP2.6	SSP1-RCP3.4	SSP1-RCP4.5	SSP1-RCP6.0	SSP1-Baseline	SSP2-RCP1.9	SSP2-RCP2.6	SSP2-RCP3.4	SSP2-RCP4.5	SSP2-RCP6.0	SSP2-Baseline	SSP3-RCP1.9	SSP3-RCP2.6	SSP3-RCP3.4	SSP3-RCP4.5	SSP3-RCP6.0	SSP3-Baseline	SSP4-RCP1.9	SSP4-RCP2.6	SSP4-RCP3.4	SSP4-RCP4.5	SSP4-RCP6.0	SSP4-Baseline	SSP5-RCP1.9	SSP5-RCP2.6	SSP5-RCP3.4	SSP5-RCP4.5	SSP5-RCP6.0
Australia	OECD	32.748	33.3957	33.3957	40.6715		15.713	31.6788	32.2673	32.2673	32.2673	32.2673				29.087	29.087	29.087	6.15782		21.125	21.125	21.125		20.1177		30.3439	30.3439	30.3439	30.3439
Brazil	LAM	89.6776	89.17	89.17	81.5746		95.3977														91.9758	91.9758	91.9758		87.3472		-41.112	-41.112	-41.112	-41.112
Canada	OECD	32.5893	33.139	33.139	39.6338		19.7141	27.3191	27.8699	27.8699	27.8699	27.8699				25.4607	25.4607	25.4607	12.4261		21.1837	21.1837	21.1837		20.3847		26.6697	26.6697	26.6697	26.6697
Central Asia	REF	17.8055	17.9905	17.9905	20.3927		13.553	20.5826	17.8051	17.8051	17.8051	17.8051	4.8028			11.2059	11.2059	11.2059	7.25346		10.7667	10.7667	10.7667		10.3297		13.5833	13.5833	13.5833	13.5833
China	ASIA	12.5854	12.4741	12.4741	11.04		14.1868																				-32.2686	-32.2686	-32.2686	-32.2686
European Union	OECD	118.35	120.156	120.156	140.518		72.7429	97.8862	99.918	99.918	99.918	99.918				90.5848	90.5848	90.5848	22.9492		69.0327	69.0327	69.0327		65.7893		95.5167	95.5167	95.5167	95.5167
India	ASIA	11.6647	11.5958	11.5958	10.6668		12.2662																				-24.9665	-24.9665	-24.9665	-24.9665
Japan	OECD	109.379	110.871	110.871	127.897		73.1658	86.0183	87.8134	87.8134	87.8134	87.8134				79.8555	79.8555	79.8555	30.605		63.4433	63.4433	63.4433		60.8576		84.5524	84.5524	84.5524	84.5524
Korea, Republic of	ASIA	44.4743	44.1924	44.1924	40.4822		47.6955																				-96.4295	-96.4295	-96.4295	-96.4295
Malaysia	ASIA	11.3959	11.4661	11.4661	12.0508		8.59749																				17.3618	17.3618	17.3618	17.3618
Mexico	LAM	106.791	107.383	107.383	114.34		93.3447														82.2785	82.2785	82.2785		81.2872		190.177	190.177	190.177	190.177
Rest of Central America	LAM	15.4428	15.1996	15.1996	10.9389		18.1653														15.8113	15.8113	15.8113		13.9792		-56.0924	-56.0924	-56.0924	-56.0924
Rest of East Asia	ASIA	26.3891	26.3963	26.3963	26.2197		24.6405																				1.21405	1.21405	1.21405	1.21405
Rest of Europe	REF	-13.4658	-14.1569	-14.1569	-25.2764		4.08687	-43.2006	-27.2936	-27.2936	-27.2936	-27.2936	23.9802			15.1053	15.1053	15.1053	33.2302		31.4241	31.4241	31.4241		32.8985		-3.52824	-3.52824	-3.52824	-3.52824
Rest of North Africa	MAF	9.38319	9.3699	9.3699	8.67422		8.84571	2.83404	3.02436	3.02436	3.02436	3.02436									8.64349	8.64349	8.64349		8.45632		1.93673	1.93673	1.93673	1.93673
Rest of Oceania	OECD	61.4188	62.5091	62.5091	74.9868		35.3264	44.1068	45.4849	45.4849	45.4849	45.4849				39.9408	39.9408	39.9408	12.7134		30.0814	30.0814	30.0814		28.261		43.1826	43.1826	43.1826	43.1826
Rest of South America	LAM	43.5657	43.4142	43.4142	40.916		44.3754														40.7843	40.7843	40.7843		38.7575		-3.18698	-3.18698	-3.18698	-3.18698
Rest of South Asia	ASIA	18.6492	18.5777	18.5777	17.5036		18.6802																				-23.3658	-23.3658	-23.3658	-23.3658
Rest of Southeast Asia	ASIA	17.4891	17.47	17.47	17.0323		16.5112																				-9.70528	-9.70528	-9.70528	-9.70528
Rest of Sub-Saharan Africa	MAF	11.0395	10.9363	10.9363	8.53143		11.7121	-29.1538	-33.7241	-33.7241	-33.7241	-33.7241									13.6685	13.6685	13.6685		12.247		-32.1104	-32.1104	-32.1104	-32.1104
Rest of the World	\
Rest of Western Asia	MAF	-0.388475	-0.44403	-0.44403	-1.70242		0.0101387	-22.5731	-25.3991	-25.3991	-25.3991	-25.3991									-0.111678	-0.111678	-0.111678		-1.34773		-24.9551	-24.9551	-24.9551	-24.9551
Russian Federation	REF	74.3114	75.7153	75.7153	94.3775		40.5553	120.361	94.1751	94.1751	94.1751	94.1751	-14.906			29.7572	29.7572	29.7572	-6.10135		12.9806	12.9806	12.9806		10.0155		53.1501	53.1501	53.1501	53.1501
Switzerland	OECD	116.913	118.703	118.703	138.834		71.9195	92.3546	94.5603	94.5603	94.5603	94.5603				84.9849	84.9849	84.9849	26.2106		64.4651	64.4651	64.4651		61.168		90.3063	90.3063	90.3063	90.3063
Thailand	ASIA	2.82881	2.72709	2.72709	1.43903		4.15961																				-44.0165	-44.0165	-44.0165	-44.0165
United Arab Emirates	MAF	15.1946	15.2476	15.2476	15.4573		12.9979	26.9533	30.3206	30.3206	30.3206	30.3206									8.5263	8.5263	8.5263		9.14359		28.2262	28.2262	28.2262	28.2262
United States of America	OECD	21.918	22.243	22.243	25.9538		13.8557	18.5018	18.8794	18.8794	18.8794	18.8794				17.2401	17.2401	17.2401	8.28174		13.6883	13.6883	13.6883		13.1682		18.081	18.081	18.081	18.081
Globe average		38.775	39.067	39.067	42.0444		30.47	33.8335	33.2644	33.2644	33.2644	33.2644	4.62568			42.3222	42.3222	42.3222	15.3726		33.3204	33.3204	33.3204		31.8256		11.6371	11.6371	11.6371	11.6371

## Sheet: GCAM4
Reduction cost of carbon. Unit: US$ per tCO2		SSP1-RCP1.9	SSP1-RCP2.6	SSP1-RCP3.4	SSP1-RCP4.5	SSP1-RCP6.0	SSP1-Baseline	SSP2-RCP1.9	SSP2-RCP2.6	SSP2-RCP3.4	SSP2-RCP4.5	SSP2-RCP6.0	SSP2-Baseline	SSP3-RCP1.9	SSP3-RCP2.6	SSP3-RCP3.4	SSP3-RCP4.5	SSP3-RCP6.0	SSP3-Baseline	SSP4-RCP1.9	SSP4-RCP2.6	SSP4-RCP3.4	SSP4-RCP4.5	SSP4-RCP6.0	SSP4-Baseline	SSP5-RCP1.9	SSP5-RCP2.6	SSP5-RCP3.4	SSP5-RCP4.5	SSP5-RCP6.0
Australia	OECD	26.6433	26.7891	26.7891	26.7891		18.3935	26.4301	26.4878	26.4878	26.4878	26.4878	19.8812								27.2628	27.2625	27.2625	27.2625	19.4235	22.7208	22.8205	22.8205	22.8205	22.82
Brazil	LAM	138.686	139.282	139.282	139.282		87.4683	114.712	115.053	115.052	115.052	115.052	34.9109								121.866	121.866	121.866	121.866	59.5397	112.325	112.917	112.918	112.918	112.918
Canada	OECD	27.6969	27.8263	27.8261	27.8261		20.5313	25.749	25.803	25.803	25.803	25.803	19.325								26.9058	26.9058	26.9058	26.9058	19.7376	22.5455	22.637	22.637	22.637	22.637
Central Asia	REF	18.921	18.9617	18.9617	18.9617		15.0392	17.1568	17.1798	17.1798	17.1798	17.1798	11.7853								16.237	16.237	16.237	16.237	11.3955	20.0707	20.04	20.0399	20.0399	20.0399
China	ASIA	8.45301	8.40595	8.40606	8.40606		10.5242	-2.50595	-2.58104	-2.58104	-2.58104	-2.58104	3.17872								0.959305	0.959305	0.959304	0.959304	5.44914	-9.45571	-9.61627	-9.61627	-9.61627	-9.61626
European Union	OECD	98.3203	98.7663	98.7663	98.7663		73.6491	89.4977	89.6868	89.6868	89.6868	89.6868	67.3686								94.309	94.309	94.309	94.309	69.0902	75.8453	76.18	76.1793	76.1793	76.1793
India	ASIA	6.64541	6.61059	6.61059	6.61059		7.96395	-4.28019	-4.34374	-4.34374	-4.34374	-4.34374	0.243895								-0.92716	-0.92716	-0.92716	-0.92716	2.41641	-11.1278	-11.2654	-11.2654	-11.2654	-11.2654
Japan	OECD	92.2377	92.6111	92.6111	92.6111		71.5034	81.9601	82.123	82.123	82.123	82.123	62.1013								86.6891	86.6895	86.6891	86.6895	64.8417	69.9788	70.2699	70.2699	70.2699	70.2699
Korea, Republic of	ASIA	28.2817	28.1465	28.1462	28.1462		33.8819	-10.4797	-10.7214	-10.7214	-10.7214	-10.7214	7.30487								1.62121	1.62121	1.62121	1.62121	15.035	-35.4215	-35.9446	-35.9446	-35.9446	-35.9446
Malaysia	ASIA	6.78512	6.83265	6.83277	6.83277		3.59525	4.03088	4.0805	4.0805	4.0805	4.0805	-0.866618								4.02331	4.02331	4.02331	4.02331	-0.466978	5.48273	5.60375	5.60452	5.60452	5.60451
Mexico	LAM	102.596	102.878	102.878	102.878		89.3199	90.5949	90.7222	90.7221	90.7221	90.7221	104.269								94.7209	94.721	94.7209	94.7209	90.3661	83.3048	83.5733	83.5733	83.5735	83.5733
Rest of Central America	LAM	48.1401	48.6046	48.6046	48.6046		13.5628	27.5569	27.7956	27.7958	27.7958	27.7958	-10.4616								33.4283	33.4286	33.4284	33.4286	1.35172	25.4575	25.8089	25.8091	25.809	25.8092
Rest of East Asia	ASIA	19.2592	19.2736	19.2736	19.2736		17.4829	8.72879	8.71959	8.71959	8.71959	8.71959	7.73006								11.407	11.407	11.407	11.407	10.0412	4.92447	4.91021	4.91021	4.91021	4.9102
Rest of Europe	REF	-25.7907	-25.6466	-25.6466	-25.6466		-22.4897	-19.323	-19.2695	-19.2695	-19.2695	-19.2695	-8.80306								-7.48336	-7.48335	-7.48335	-7.48335	0.171162	-42.7384	-42.2796	-42.2795	-42.2794	-42.2794
Rest of North Africa	MAF	13.6384	13.7243	13.7243	13.7243		9.32759	10.6915	10.7387	10.7386	10.7386	10.7386	6.22554								11.3422	11.3422	11.3422	11.3422	6.66439	9.31883	9.4024	9.4024	9.40239	9.40239
Rest of Oceania	OECD	49.7999	50.0803	50.0803	50.0803		34.1825	42.4166	42.5424	42.5424	42.5424	42.5424	27.1342								45.895	45.895	45.895	45.895	29.3308	33.8201	34.045	34.045	34.045	34.045
Rest of South America	LAM	65.8502	66.192	66.192	66.192		40.0657	52.1225	52.2974	52.2976	52.2976	52.2976	19.8718								56.1631	56.1631	56.1631	56.1631	28.4119	49.9856	50.2897	50.2899	50.2898	50.29
Rest of South Asia	ASIA	11.6132	11.5935	11.5935	11.5935		11.7123	-1.94603	-1.99512	-1.99512	-1.99511	-1.99511	0.735354								1.83628	1.83628	1.83628	1.83628	3.55576	-8.45463	-8.55498	-8.55497	-8.55497	-8.55497
Rest of Southeast Asia	ASIA	11.2846	11.284	11.2842	11.2842		10.5214	1.54626	1.52419	1.52419	1.52419	1.52419	2.17601								4.046	4.046	4.046	4.046	4.12349	-2.48469	-2.52626	-2.52626	-2.52626	-2.52626
Rest of Sub-Saharan Africa	MAF	20.55	20.68	20.68	20.68		13.8051	16.9114	16.9867	16.987	16.9867	16.9867	9.57695								17.4984	17.4984	17.4984	17.4984	9.68175	15.6663	15.7917	15.7917	15.7917	15.7917
Rest of the World	\
Rest of Western Asia	MAF	4.53368	4.60465	4.60465	4.60465		1.13479	2.40358	2.44232	2.44232	2.44232	2.44232	-1.03925								2.69111	2.69111	2.6911	2.69093	-1.09416	1.73609	1.80062	1.80062	1.80062	1.80062
Russian Federation	REF	76.1053	76.238	76.238	76.238		59.5003	65.9212	65.9944	65.9944	65.9947	65.9944	42.1919								56.6861	56.686	56.686	56.686	32.8893	84.3364	84.0274	84.0272	84.0271	84.027
Switzerland	OECD	96.9417	97.4007	97.4007	97.4007		71.2902	86.0929	86.2963	86.2963	86.2963	86.2963	61.7235								91.5418	91.5418	91.5418	91.5418	64.5594	71.2547	71.6271	71.6279	71.6279	71.6279
Thailand	ASIA	-4.18331	-4.2599	-4.2599	-4.2599		-0.200746	-18.9171	-19.0407	-19.0407	-19.0407	-19.0407	-7.73225								-14.047	-14.047	-14.047	-14.047	-5.70564	-31.4963	-31.7652	-31.7652	-31.7652	-31.766
United Arab Emirates	MAF	17.7253	17.8445	17.8445	17.8445		11.6354	12.0491	12.1112	12.1112	12.1112	12.1112	6.27448								13.5139	13.5137	13.5137	13.5137	7.55608	9.34893	9.46047	9.46046	9.46046	9.46046
United States of America	OECD	18.535	18.6147	18.6147	18.6147		14.0774	17.0514	17.0856	17.0856	17.086	17.0856	12.971								17.8939	17.8939	17.8939	17.8939	13.3314	14.6213	14.6843	14.6843	14.6843	14.6843
Globe average		37.6642	37.8207	37.8207	37.8207		27.5953	28.3143	28.3738	28.3738	28.3738	28.3738	19.1568								31.3877	31.3877	31.3877	31.3877	21.6037	22.7525	22.8437	22.8438	22.8438	22.8437

## Sheet: REMIND
Reduction cost of carbon. Unit: US$ per tCO2		SSP1-RCP1.9	SSP1-RCP2.6	SSP1-RCP3.4	SSP1-RCP4.5	SSP1-RCP6.0	SSP1-Baseline	SSP2-RCP1.9	SSP2-RCP2.6	SSP2-RCP3.4	SSP2-RCP4.5	SSP2-RCP6.0	SSP2-Baseline	SSP3-RCP1.9	SSP3-RCP2.6	SSP3-RCP3.4	SSP3-RCP4.5	SSP3-RCP6.0	SSP3-Baseline	SSP4-RCP1.9	SSP4-RCP2.6	SSP4-RCP3.4	SSP4-RCP4.5	SSP4-RCP6.0	SSP4-Baseline	SSP5-RCP1.9	SSP5-RCP2.6	SSP5-RCP3.4	SSP5-RCP4.5	SSP5-RCP6.0
Australia	OECD	30.3442	30.3442	30.3442	30.3442		20.9796	28.2556	28.2556	28.2556	28.2556	28.2556	21.1													21.7584	21.7584	21.7584	21.7584	21.7584
Brazil	LAM	148.267	148.267	148.267	148.267		146.539	67.6726	67.6726	67.6726	67.6726	67.6726	62.5949													-68.1244	-68.1244	-68.1244	-68.1244	-68.1244
Canada	OECD	32.0284	32.0284	32.0284	32.0284		24.8773	25.987	25.987	25.987	25.987	25.987	20.9082													20.2388	20.2388	20.2388	20.2388	20.2388
Central Asia	REF	18.3681	18.3681	18.3681	18.3681		16.7876	12.3172	12.3172	12.3172	12.3172	12.3172	10.5904													12.2288	12.2288	12.2288	12.2288	12.2288
China	ASIA	5.63154	5.63154	5.63154	5.63154		5.23738																			3.83951	3.83951	3.83951	3.83951	3.83951
European Union	OECD	112.609	112.609	112.609	112.609		84.3353	90.6638	90.6638	90.6638	90.6638	90.6638	68.3083													72.527	72.527	72.527	72.527	72.527
India	ASIA	4.24436	4.24436	4.24436	4.24436		2.81266																			1.29672	1.29672	1.29672	1.29672	1.29672
Japan	OECD	103.706	103.706	103.706	103.706		80.1879	80.6386	80.6386	80.6386	80.6386	80.6386	62.1417													66.183	66.183	66.183	66.183	66.183
Korea, Republic of	ASIA	19.2126	19.2126	19.2126	19.2126		15.3122																			10.7379	10.7379	10.7379	10.7379	10.7379
Malaysia	ASIA	9.99421	9.99421	9.99421	9.99421		7.85876																			-1.5952	-1.5952	-1.5952	-1.5952	-1.5952
Mexico	LAM	114.334	114.334	114.334	114.334		107.403	100.247	100.247	100.247	100.247	100.247	97.1583													190.473	190.473	190.473	190.473	190.473
Rest of Central America	LAM	56.6195	56.6195	56.6195	56.6195		53.8273	3.04469	3.04469	3.04469	3.04469	3.04469	1.89336													-64.6912	-64.6912	-64.6912	-64.6912	-64.6912
Rest of East Asia	ASIA	19.6804	19.6804	19.6804	19.6804		16.7092																			8.1844	8.1844	8.1844	8.1844	8.1844
Rest of Europe	REF	29.748	29.748	29.748	29.748		28.6925	31.8288	31.8288	31.8288	31.8288	31.8288	34.4452													-15.2122	-15.2122	-15.2122	-15.2122	-15.2122
Rest of North Africa	MAF	22.9076	22.9076	22.9076	22.9076		23.7961	8.83126	8.83126	8.83126	8.83126	8.83126	9.30176													1.56704	1.56704	1.56704	1.56704	1.56704
Rest of Oceania	OECD	59.4354	59.4354	59.4354	59.4354		43.5706	41.6136	41.6136	41.6136	41.6136	41.6136	29.4118													29.3681	29.3681	29.3681	29.3681	29.3681
Rest of South America	LAM	72.3807	72.3807	72.3807	72.3807		70.1352	32.3601	32.3601	32.3601	32.3601	32.3601	30.0699													-13.0254	-13.0254	-13.0254	-13.0254	-13.0254
Rest of South Asia	ASIA	10.2739	10.2739	10.2739	10.2739		8.14986																			1.47221	1.47221	1.47221	1.47221	1.47221
Rest of Southeast Asia	ASIA	10.9265	10.9265	10.9265	10.9265		8.76428																			2.61266	2.61266	2.61266	2.61266	2.61266
Rest of Sub-Saharan Africa	MAF	33.937	33.937	33.937	33.937		35.6415	11.6776	11.6776	11.6776	11.6776	11.6776	15.3082													-7.2751	-7.2751	-7.2751	-7.2751	-7.2751
Rest of the World	\
Rest of Western Asia	MAF	12.8007	12.8007	12.8007	12.8007		13.8887	-1.12532	-1.12532	-1.12532	-1.12532	-1.12532	1.21945													-9.58551	-9.58551	-9.58551	-9.58551	-9.58551
Russian Federation	REF	57.0817	57.0817	57.0817	57.0817		45.9213	25.0705	25.0705	25.0705	25.0705	25.0705	12.9687													51.1581	51.1581	51.1581	51.1581	51.1581
Switzerland	OECD	111.994	111.994	111.994	111.994		84.3426	86.1663	86.1663	86.1663	86.1663	86.1663	63.9105													66.5495	66.5495	66.5495	66.5495	66.5495
Thailand	ASIA	-8.64324	-8.64324	-8.64324	-8.64324		-10.2823																			-5.68135	-5.68135	-5.68135	-5.68135	-5.68135
United Arab Emirates	MAF	29.5285	29.5285	29.5285	29.5285		29.7999	10.1668	10.1668	10.1668	10.1668	10.1668	8.26197													9.79186	9.79186	9.79186	9.79186	9.79186
United States of America	OECD	20.9469	20.9469	20.9469	20.9469		16.1693	17.3302	17.3302	17.3302	17.3302	17.3302	13.6271													13.8278	13.8278	13.8278	13.8278	13.8278
Globe average		43.783	43.783	43.783	43.783		37.7483	37.3748	37.3748	37.3748	37.3748	37.3748	31.29													15.3317	15.3317	15.3317	15.3317	15.3317

## Sheet: IMAGE
Reduction cost of carbon. Unit: US$ per tCO2		SSP1-RCP1.9	SSP1-RCP2.6	SSP1-RCP3.4	SSP1-RCP4.5	SSP1-RCP6.0	SSP1-Baseline	SSP2-RCP1.9	SSP2-RCP2.6	SSP2-RCP3.4	SSP2-RCP4.5	SSP2-RCP6.0	SSP2-Baseline	SSP3-RCP1.9	SSP3-RCP2.6	SSP3-RCP3.4	SSP3-RCP4.5	SSP3-RCP6.0	SSP3-Baseline	SSP4-RCP1.9	SSP4-RCP2.6	SSP4-RCP3.4	SSP4-RCP4.5	SSP4-RCP6.0	SSP4-Baseline	SSP5-RCP1.9	SSP5-RCP2.6	SSP5-RCP3.4	SSP5-RCP4.5	SSP5-RCP6.0
Australia	OECD	29.0166	20.3379	19.2814	19.4155		19.1285		31.0695	29.3517	26.7238	23.7124	17.3876			29.5025	27.8319	23.9784	22.3636		22.8489	22.7049	23.771	23.7323	18.6472			23.739	23.1826	24.6023
Brazil	LAM	206.395	120.667	104.679	104.557		106.436		77.9012	80.8995	82.8054	85.8695	90.504			28.9557	-17.3592	-87.0752	-95.5602		154.44	108.178	87.9743	87.9189	91.3787			88.573	65.4729	-36.9028
Canada	OECD	34.9256	23.1183	21.4255	21.5089		21.3395		30.8064	28.3468	25.9355	23.6156	19.5688			27.4584	25.2655	21.8875	20.7314		27.6758	24.3632	24.5005	24.4572	20.8896			22.5633	21.2185	21.5037
Central Asia	REF	21.731	14.7002	13.6355	13.6651		13.6387		17.3933	16.322	14.6192	13.3472	11.8736			25.1246	36.9173	27.6457	24.5595		18.7212	14.2132	13.5138	13.4834	12.5619			117.546
China	ASIA	21.007	10.7992	9.09357	9.07306		9.06742		6.31048	2.25805	0.857584	1.24675	3.56578			3.21149	0.0354413	-0.560042	1.17408		16.8059	10.6539	9.83933	9.80896	10.5028			-4.43726	-4.29351	-20.1911
European Union	OECD	125.342	82.5373	75.7737	76.1069		75.3787		109.711	100.466	91.2239	81.9964	64.8783			98.4088	90.4349	77.5117	73.0666		101.484	88.315	89.323	89.1614	75.727			77.8005	74.4649	76.3997
India	ASIA	20.9862	8.77584	6.57351	6.56152		6.53514		4.74739	0.501084	-1.09306	-1.09755	0.329151			1.40003	-1.49533	-2.42229	-1.24425		16.0538	8.80922	7.93507	7.89764	8.22529			-6.24465	-5.43071	-16.1523
Japan	OECD	120.113	79.7851	73.1189	73.3702		72.8474		100.079	91.2503	83.1234	75.4534	62.1127			88.9315	81.1562	69.6034	65.9417		98.1271	84.0393	84.0635	83.9184	73.5472			70.8031	67.1562	67.5897
Korea, Republic of	ASIA	74.3602	35.7668	28.8316	28.7809		28.7089		21.4256	6.65155	1.05328	1.37055	7.40847			10.2971	-0.180207	-3.17499	1.68477		58.7334	35.6422	32.7273	32.6056	34.1678			-17.0784	-14.795	-59.4176
Malaysia	ASIA	27.9236	6.95984	3.55932	3.5664		3.5119		7.69273	5.07504	4.13137	3.22594	1.81406			3.22309	2.13166	1.20166	0.259247		18.5249	6.63418	5.20749	5.14471	4.25622			2.81635	0.969848	8.65624
Mexico	LAM	144.689	96.9544	89.9749	90.0285		89.8787		111.343	102.075	96.3048	91.409	85.539			125.146	160.318	228.26	235.776		117.698	95.9327	95.1906	95.0686	90.6343			81.7887	82.0392	172.046
Rest of Central America	LAM	103.612	34.334	22.3507	22.2795		23.3959		7.34151	8.89999	10.3103	12.1611	15.0274			-16.5312	-41.063	-79.2682	-83.1669		63.5524	25.5757	13.614	13.5523	15.5801			14.089	4.25314	-52.0643
Rest of East Asia	ASIA	46.8391	20.9106	16.6109	16.6078		16.5681		17.7278	12.4648	10.5719	9.97472	10.0508			11.5115	8.20527	6.56924	6.80209		35.4764	20.7841	19.0113	18.9392	18.522			5.70965	5.12216	1.40982
Rest of Europe	REF	44.9289	9.57222	1.20001	0.954968		0.997812		2.29664	-3.66752	2.77433	7.52839	13.5811			-71.8135	-140.061	-94.8394	-80.6151		49.4	16.1911	17.6045	17.6594	20.5174			-542.497
Rest of North Africa	MAF	25.926	12.0539	9.677	9.65063		9.61596		18.7066	14.0339	11.9714	11.0156	11.0309			10.8195	7.9931	6.94459	6.99319		16.7456	8.23854	5.21109	5.07297	4.92406			8.2962	4.12797	-0.0166699
Rest of Oceania	OECD	70.594	40.8653	35.7833	35.9515		35.5963		55.9471	49.267	43.344	37.9059	29.0574			46.8148	40.7844	32.2958	29.7094		54.4753	43.429	43.1392	43.0273	35.6378			33.7303	30.2159	30.1846
Rest of South America	LAM	110.027	56.2713	47.7279	47.6797		48.5168		38.1462	38.2823	38.4356	39.2361	40.5872			18.9918	3.61848	-18.2233	-20.8608		76.9846	50.3461	41.1102	41.0824	42.0594			39.3146	29.919	-3.21605
Rest of South Asia	ASIA	33.8245	14.1177	10.1937	10.1794		10.1471		9.35395	3.37646	1.26002	1.05734	2.40979			3.37069	-0.608526	-2.00554	-0.887899		26.2385	13.9266	12.2529	12.1856	12.3333			-4.8871	-5.08632	-16.0287
Rest of Southeast Asia	ASIA	35.5164	12.9042	9.45109	9.44497		9.4102		9.8495	5.25142	3.56908	3.16782	3.65368			4.99053	2.16323	0.948372	1.44304		25.2217	12.7177	11.237	11.1768	11.0152			-0.518663	-0.934329	-6.30255
Rest of Sub-Saharan Africa	MAF	36.0257	17.9025	14.3834	14.3241		14.2919		28.0837	21.6519	18.7072	17.4792	18.0543			16.4379	11.8431	10.8954	11.4289		23.8021	10.1315	2.54949	2.16924	2.66778			13.8472	3.84471	-18.7153
Rest of the World	\
Rest of Western Asia	MAF	15.3671	3.08111	1.23226	1.20104		1.17399		9.11536	5.19374	3.50979	2.82214	3.14681			2.55402	0.215791	-0.228168	0.0688255		6.47704	-1.13945	-5.11923	-5.32568	-5.05132			1.01595	-4.17807	-15.7576
Russian Federation	REF	75.2755	42.7957	40.2813	40.5768		40.0841		65.1453	61.7395	49.0228	38.9075	26.3625			149.894	261.515	187.978	161.728		57.0278	39.3643	36.318	36.0981	28.5844			817.205
Switzerland	OECD	127.01	81.389	73.5515	73.872		73.1617		108.131	97.8587	88.0712	78.5769	61.7672			94.9917	85.7852	71.685	67.0926		102.203	86.6225	87.0068	86.8267	73.5648			72.5527	67.8476	69.055
Thailand	ASIA	11.8826	-0.816923	-2.58602	-2.60002		-2.68327		-5.38867	-10.3738	-12.4066	-12.4048	-10.3973			-7.50242	-10.2714	-10.7541	-9.02068		6.54937	-0.421357	-0.817961	-0.85256	-0.260892			-20.3007	-17.1688	-29.7973
United Arab Emirates	MAF	36.1577	15.7336	12.0703	12.0555		12.0103		23.6383	16.7491	13.5903	12.0306	11.4742			12.4488	8.71651	6.72494	6.37319		24.1299	12.5713	11.3401	11.3361	10.6106			8.11456	6.99551	15.8959
United States of America	OECD	22.8137	15.7003	14.5317	14.5894		14.466		20.464	18.9224	17.3195	15.7134	12.7881			18.5503	17.1149	14.7471	13.936		18.7089	16.6814	16.86	16.8325	14.4894			14.8391	14.1062	14.4252
Globe average		62.3957	33.7391	28.9387	28.977		28.9702		35.6553	30.8787	27.9129	25.9739	23.599			28.3534	25.4234	18.8587	17.6837		47.6194	32.8656	30.2063	30.1145	27.9128			35.3223	19.5239	9.87851

## Sheet: WITCH
Reduction cost of carbon. Unit: US$ per tCO2		SSP1-RCP1.9	SSP1-RCP2.6	SSP1-RCP3.4	SSP1-RCP4.5	SSP1-RCP6.0	SSP1-Baseline	SSP2-RCP1.9	SSP2-RCP2.6	SSP2-RCP3.4	SSP2-RCP4.5	SSP2-RCP6.0	SSP2-Baseline	SSP3-RCP1.9	SSP3-RCP2.6	SSP3-RCP3.4	SSP3-RCP4.5	SSP3-RCP6.0	SSP3-Baseline	SSP4-RCP1.9	SSP4-RCP2.6	SSP4-RCP3.4	SSP4-RCP4.5	SSP4-RCP6.0	SSP4-Baseline	SSP5-RCP1.9	SSP5-RCP2.6	SSP5-RCP3.4	SSP5-RCP4.5	SSP5-RCP6.0
Australia	OECD	40.42	48.4603	46.9077	46.0147	44.7597	19.4378		33.6365	33.4558	34.9941	34.7467	13.0188			27.4813	33.1973	32.9171		33.4833	40.1129	39.1113	38.9105	37.5776	15.4263			31.4815	32.155	32.7364
Brazil	LAM	108.9	75.0688	50.1079	49.6444	57.6826	26.8716		-109.627							39.3583				68.9462	-182.79		-679.385	-57.6614				36.7925	51.1658	15.7202
Canada	OECD	40.8763	46.1663	43.5792	43.0596	42.0977	20.9481		33.7635	31.2742	31.7086	31.3921	16.2873			27.8275	28.4737	28.2034		32.7808	36.0319	34.6497	34.7052	33.8704	17.0907			31.7873	30.3263	29.81
Central Asia	REF	22.059	20.0277	17.981	18.1826	18.3605	12.9001		17.4417	15.0952	15.2148	14.8686	8.53802			41.2303				17.692	15.3964	14.6968	14.9286	15.0715	9.34311			16.6993	16.8701	21.4151
China	ASIA	-1.01073			-68.0239	-48.4548	4.16906		12.265	7.21459	-0.710426	-4.09475				9.54442				-2.75204					1.87528			12.4175	6.95416	1.74968
European Union	OECD	143.72	159.067	151.666	150.21	147.219	72.7633		123.269	114.185	114.662	113.222	42.7527			99.0612	102.304	101.377		116.993	128.52	123.982	123.887	120.489	56.0435			115.778	110.021	107.594
India	ASIA	-0.818344			-53.169	-38.7722	1.63259		11.546	5.98733	-1.11845	-3.99041				7.53477				-3.25015					-1.17672			11.4279	5.55453	0.650132
Japan	OECD	128.247	139.403	133.023	132.059	129.56	68.2821		112.587	103.178	102.241	100.698	41.7063			91.5412	89.8351	89.0179		104.691	112.649	108.742	108.662	105.776	53.8096			106.678	100.023	96.6115
Korea, Republic of	ASIA	-0.946999			-208.149	-149.755	10.7146		43.765	25.4623	-0.511236	-11.4676				32.002				-9.08804					0.821559			43.7467	24.1603	6.80024
Malaysia	ASIA	12.1004			41.0788	31.0168	3.35378		13.1413	5.82239	4.93186	6.02713				7.75735				9.32149					1.78195			12.0796	5.04616	3.35625
Mexico	LAM	122.576	130.077	137.295	137.899	133.3	129.897		253.332							128.184				120.752	382.462		987.316	241.177				131.476	112.654	134.707
Rest of Central America	LAM	29.6174	4.59288	-8.92936	-8.88773	-4.60331	-15.7358		-85.3302							-11.3825				2.49981	-141.158		-436.83	-69.0184				-11.9445	-5.10145	-23.6692
Rest of East Asia	ASIA	17.094			-4.3429	-0.278029	11.9452		27.2798	17.439	10.9784	9.31979				19.403				12.5442					8.24981			26.4136	16.7684	11.3617
Rest of Europe	REF	83.2838	63.6868	42.9628	45.4653	49.0045	44.0231		42.1945	6.66233	2.4353	6.66212	31.9352			-154.361				58.4644	36.1357	22.5028	26.0695	30.831	31.8047			17.7456	-16.6684	-49.9545
Rest of North Africa	MAF	21.1223	16.178	12.1889	13.0314	14.3517	10.1723		14.5338	7.87318	7.74967	8.53214	9.17463			21.8221	-1.36217			16.0426	9.52074	8.14552	9.69681	11.6124	7.77235			14.917	7.35911	7.33702
Rest of Oceania	OECD	77.2282	85.2391	80.0592	79.3612	77.6503	33.4367		64.3877	56.9135	56.386	55.3974	18.6349			49.7354	46.7605	46.1142		59.7872	64.7109	61.5329	61.696	59.9103	23.219			60.0068	54.585	52.073
Rest of South America	LAM	54.1027	38.8365	28.7038	28.6419	31.5919	19.1146		-23.2978							23.4914				35.2391	-42.7889		-188.374	-5.71652				23.3703	27.1735	14.6421
Rest of South Asia	ASIA	4.92019			-46.5181	-32.9945	4.15576		18.9761	9.64755	0.658511	-2.37274				12.6204				0.735991					0.237502			18.5686	9.03059	2.37467
Rest of Southeast Asia	ASIA	7.69261			-20.0622	-13.4615	4.90713		17.9934	9.72494	3.57114	1.74834				12.1216				4.05498					1.69628			17.4503	9.20059	4.46411
Rest of Sub-Saharan Africa	MAF	30.747	23.4915	16.1698	17.9141	20.5551	15.1918		19.9912	7.97623	7.96654	10.186	16.5075			32.5336	-51.0585			23.9304	9.69087	4.05265	11.7495	16.9031	11.8939			21.2109	7.63351	8.37014
Rest of the World	\
Rest of Western Asia	MAF	10.4733	5.71628	1.60322	2.65838	4.163	1.45918		4.49146	-1.85998	-2.01228	-0.919339	2.25112			12.2515	-33.088			6.20205	-1.94146	-4.94199	-0.566019	2.26075	-0.25323			5.20762	-2.15544	-1.69746
Russian Federation	REF	72.5528	65.5386	58.6549	59.1569	58.9518	24.4795		57.1668	57.1209	60.2204	56.0789	2.76673			263.055				50.9763	46.1662	47.9008	47.5301	45.5911	7.94528			58.7239	73.6797	119.316
Switzerland	OECD	141.649	155.66	148.136	146.86	144.007	70.2857		121.792	111.423	111.191	109.632	41.3524			97.9279	96.8946	95.8694		114.668	124.645	119.909	119.973	116.761	52.683			114.543	107.28	104.045
Thailand	ASIA	-15.3441			-91.5172	-69.9356	-7.63811		3.09546	-2.02015	-10.418	-14.1963				-1.06368				-16.668					-9.79839			2.84997	-3.20611	-8.46703
United Arab Emirates	MAF	27.7187	20.2191	15.3166	16.4229	17.9114	11.2394		20.2506	12.1376	11.1016	11.0927	6.67248			27.4238	34.3626			19.9419	12.6648	13.267	11.7949	13.0036	7.26042			20.3922	11.6775	10.3256
United States of America	OECD	26.2043	29.2588	28.0301	27.7232	27.1472	14.2361		22.6238	21.289	21.4621	21.2198	10.1549			18.597	19.291	19.1179		21.6856	23.9426	23.1831	23.1514	22.5292	11.5776			21.3759	20.5602	20.1961
Globe average		46.3532	62.5938	55.7475	21.3352	26.5798	23.5478		33.5103	29.8183	26.4865	25.1719	18.6966			35.9884	33.2373	58.9453		34.6028	37.4429	44.0524	17.4952	41.1649	14.0593			36.9691	31.2595	27.7641
